# Supplementary material for: Streptophyte phytochromes exhibit an N-terminus of cyanobacterial origin and a C-terminus of proteobacterial origin
Source: PubMed Central journal article supplement (PMC4422448; doi:10.1186/s13104-015-1082-3), 2015-04-13
Supplement: 13104_2015_1082_MOESM6_ESM.pdf [file 13104_2015_1082_MOESM6_ESM.pdf]

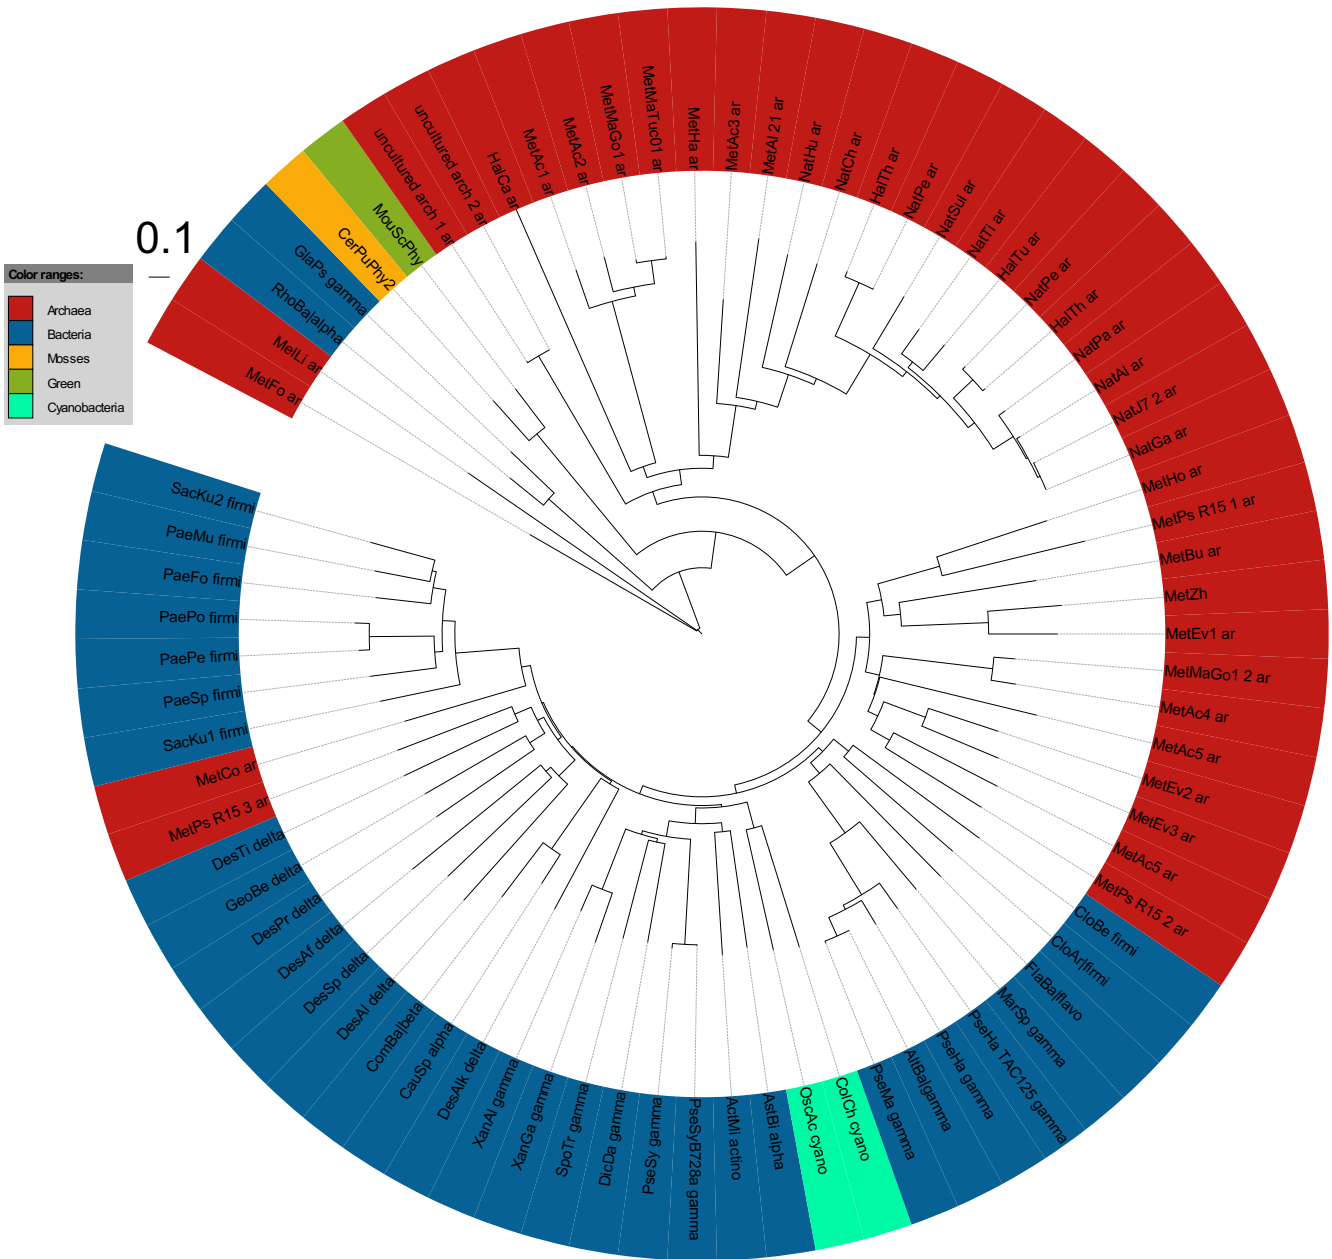

## NEIGHBOR JOINING

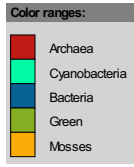

0.1

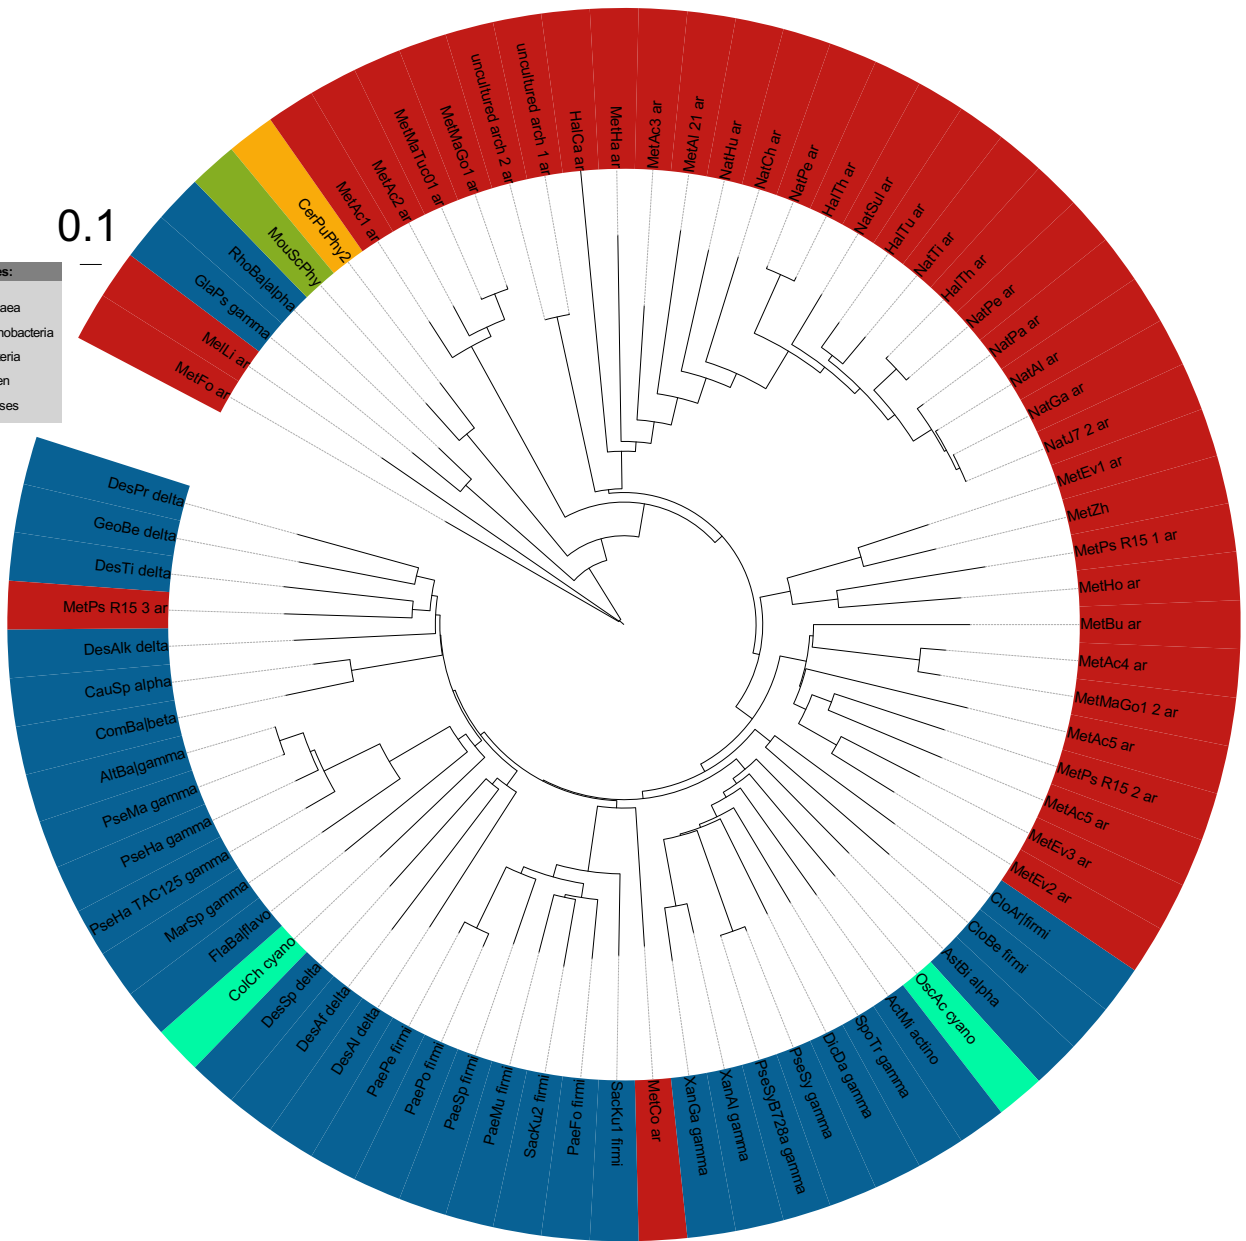

FITCH







NatGa\_ar ar 495734402\_ref\_WP\_008458981.  
NatTi\_ar ar 493009759\_ref\_WP\_006089203.  
HalTu\_ar ar 284164195\_ref\_YP\_003402474.  
MetAl\_21\_ar ar 325958983\_ref\_YP\_004290449.  
MetAc3\_ar ar 20090134\_ref\_NP\_616209.  
MetMaGol\_2\_ar ar 21228875\_ref\_NP\_634797.  
MetAc4\_ar ar 20092182\_ref\_NP\_618257.  
MetPs\_R15\_1\_ar ar 410671421\_ref\_YP\_006923792.  
MetZh\_ar 336476833\_ref\_YP\_004615974.  
MetEvl\_ar ar 298675480\_ref\_YP\_003727230.  
MetAc5\_ar ar 20090015\_ref\_NP\_616090.  
MetBu\_ar ar 91772955\_ref\_YP\_565647.  
MetEv2\_ar ar 298676132\_ref\_YP\_003727881.  
MetEv3\_ar ar 298674344\_ref\_YP\_003726094.  
MetAc5\_ar ar 20091132\_ref\_NP\_617207.  
MetPs\_R15\_2\_ar ar 410671838\_ref\_YP\_006924209.  
MetCo\_ar ar 330507467\_ref\_YP\_004383895.  
MetPs\_R15\_3\_ar ar 410672020\_ref\_YP\_006924391.  
RhoBa\_alpha ba495463062\_ref\_WP\_008187754.  
GlaPs\_gamma ba476415902\_ref\_YP\_007545820.  
FlaBa\_flavo ba495529611\_ref\_WP\_008254239.  
CloBe\_firmi ba150017917\_ref\_YP\_001310171.  
DesSp\_delta ba494790607\_ref\_WP\_007526015.  
CloAr\_firmi ba497924816\_ref\_WP\_010238972.  
ColCh\_cyano ba493030371\_ref\_WP\_006099772.  
OscAc\_cyano ba428213830\_ref\_YP\_007086974.  
DesAl\_delta ba527043629\_ref\_WP\_020886803.  
DesAf\_delta ba492833326\_ref\_WP\_005987280.  
DesPr\_delta ba320353300\_ref\_YP\_004194639.  
GeoBe\_delta ba197117615\_ref\_YP\_002138042.  
MarSp\_gamma ba152995118\_ref\_YP\_001339953.  
PseHa\_TAC125\_gamma ba77360094\_ref\_YP\_339669.  
PseHa\_gamma ba489051230\_ref\_WP\_002961437.  
AltBa\_gamma ba493845295\_ref\_WP\_006792352.  
PseMa\_gamma ba498243408\_ref\_WP\_010557564.  
AstBi\_aslpha ba493315350\_ref\_WP\_006272752.  
SacKu1\_firmi ba517807288\_ref\_WP\_018977496.  
PaePe\_firmi ba498033380\_ref\_WP\_010347536.  
PaePo\_firmi ba308067783\_ref\_YP\_003869388.  
PaeSp\_firmi ba516424588\_ref\_WP\_017813986.  
PaeMu\_firmi ba511629456\_ref\_YP\_006193285.2.  
PaeFo\_firmi ba518468174\_ref\_WP\_019638381.  
SacKu2\_firmi ba517808225\_ref\_WP\_018978433.  
CauSp\_alpha ba167644688\_ref\_YP\_001682351.  
ComBa\_beta ba550991503\_ref\_YP\_008682113.  
DicDa\_gamma ba242240530\_ref\_YP\_002988711.  
PseSyB728a\_gamma ba66046171\_ref\_YP\_236012.  
PseSy\_gamma ba489506315\_ref\_WP\_003411190.  
SpoTr\_gamma ba551338691\_ref\_WP\_022958111.  
XanGa\_gamma ba493495090\_ref\_WP\_006449713.  
XanAl\_gamma ba285018741\_ref\_YP\_003376452.  
ActMi\_actino ba383777032\_ref\_YP\_005461598.  
DesAlk\_delta ba218782287\_ref\_YP\_002433605.  
DesTi\_delta ba392410312\_ref\_YP\_006446919.
